# Supplementary material
Source: Springer Nature journal article supplement (https://www.springermedizin.de/resource/supplementary/12931_2012_1327_MOESM2_ESM.pdf/9426038)

a) Promocell  
LMVECs

b) Patient 8  
LMVECs

c) Patient 15  
LMVECs

d) Bead  
Negative cells

CD31

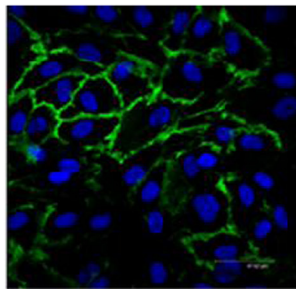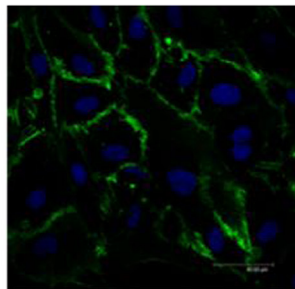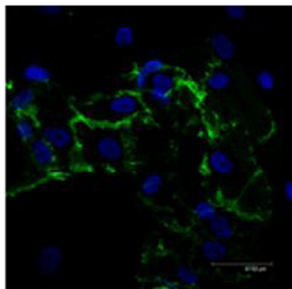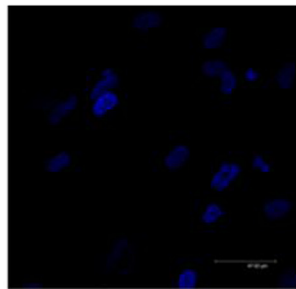

$\alpha$ SMA

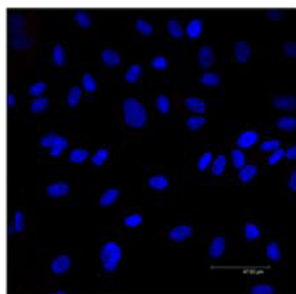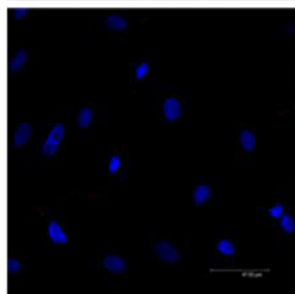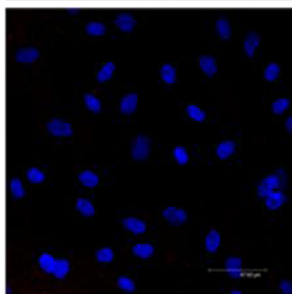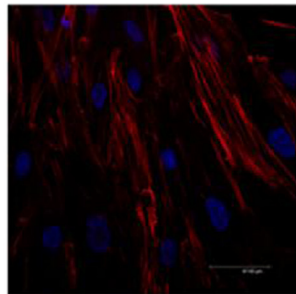

Fibronectin

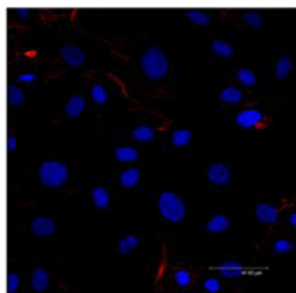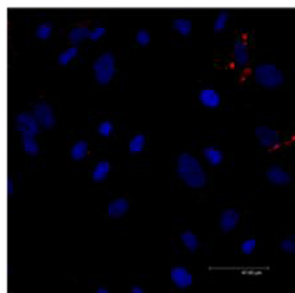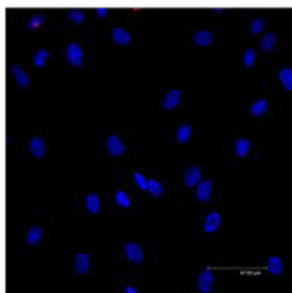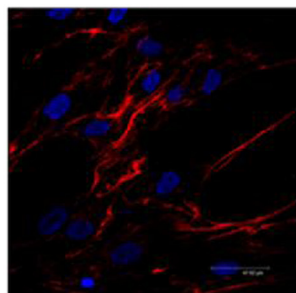

Supplement: MOESM2 [file 9426038]
